# Supplementary material for: Open-framework beryllium phosphates with a zeolitic CrB4 topology and their structural analogues containing 12-ring channels
Source: Royal Society of Chemistry journal article supplement (doi:10.1039/c4ce02226b), 2015-01-01
Supplement: c4ce02226b1.pdf [file c4ce02226b1.pdf]

**Open-framework beryllium phosphates with a zeolitic CrB<sub>4</sub>  
topology and their structural analogue containing 12-ring  
channels**

Kangcai Wang,<sup>a</sup> Jing Li,<sup>a</sup> Dingguo Xu,<sup>\*a</sup> Daibing Luo<sup>b</sup> and Zhien Lin<sup>\*a</sup>

<sup>a</sup> *College of Chemistry, Sichuan University, Chengdu 610064, P. R. China.*

<sup>b</sup> *Analytical & Testing Center, Sichuan University, Chengdu 610064, P. R. China*

\* To whom correspondence should be addressed. E-mail: dgxu@scu.edu.cn,  
zhienlin@scu.edu.cn

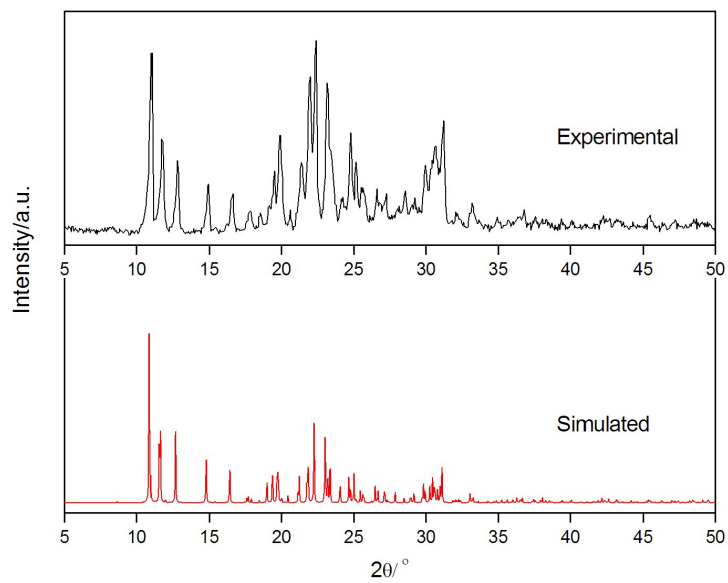

**Fig. S1.** Simulated and experimental powder XRD patterns of compound 1.

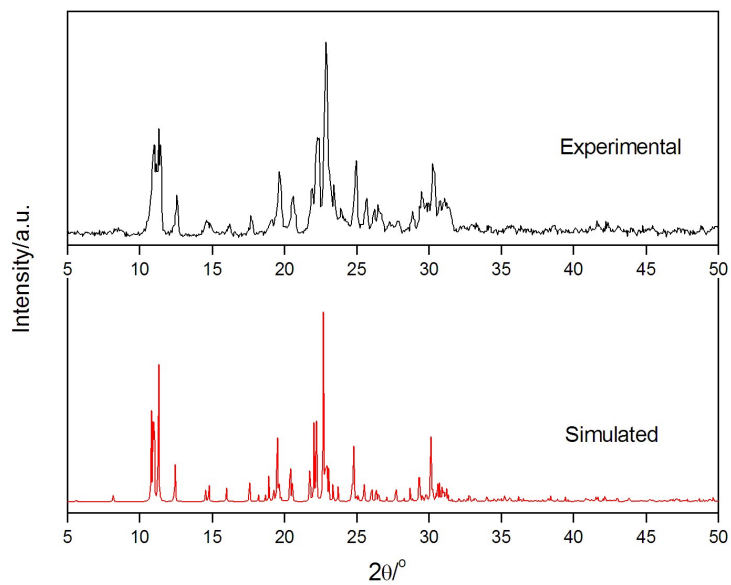

**Fig. S2.** Simulated and experimental powder XRD patterns of compound 2.

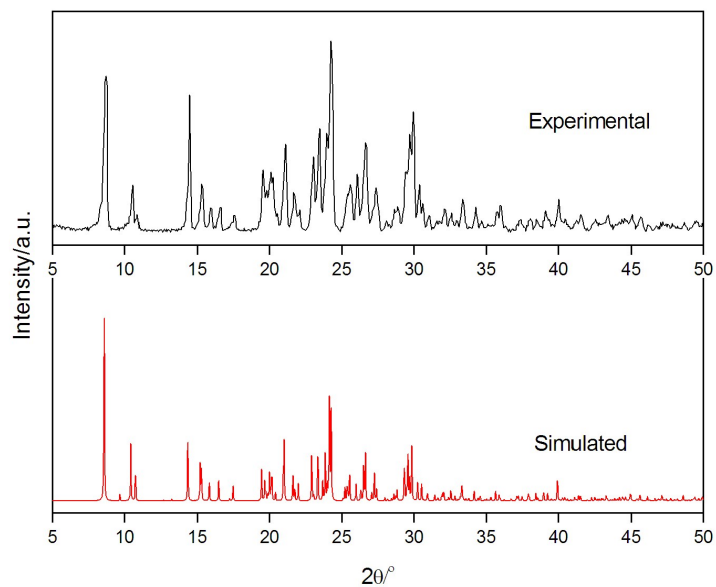

**Fig. S3.** Simulated and experimental powder XRD patterns of compound 3.

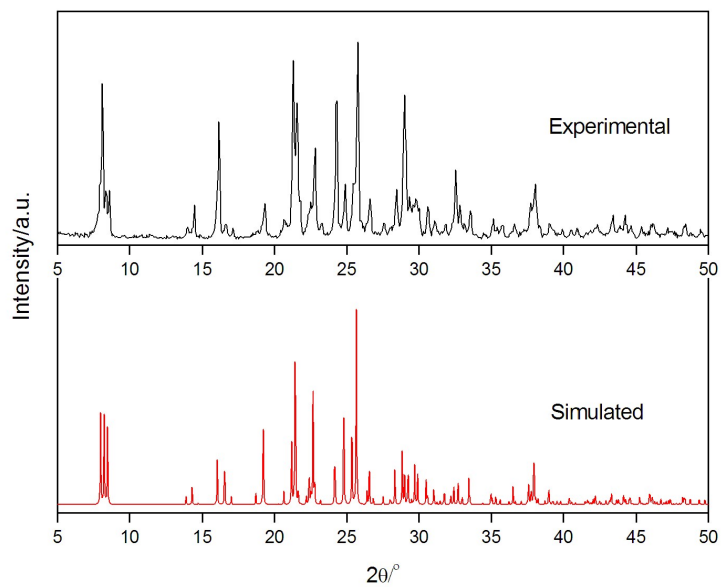

**Fig. S4.** Simulated and experimental powder XRD patterns of compound 4.

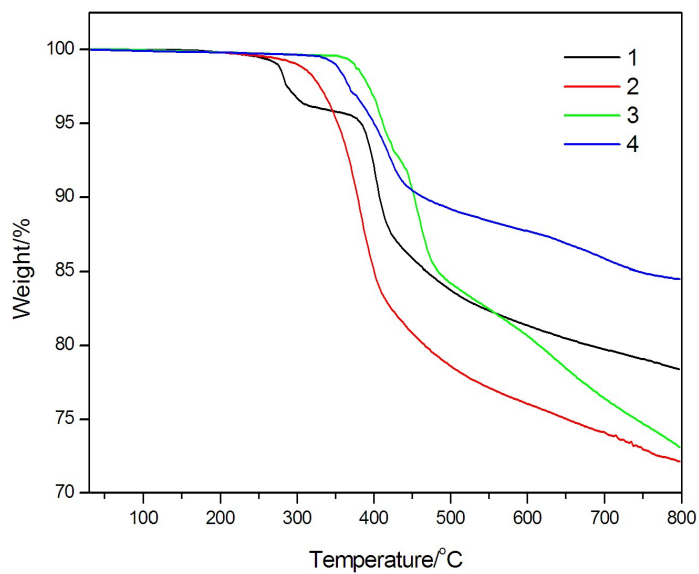

**Fig. S5.** TGA curve of compounds **1-4**.

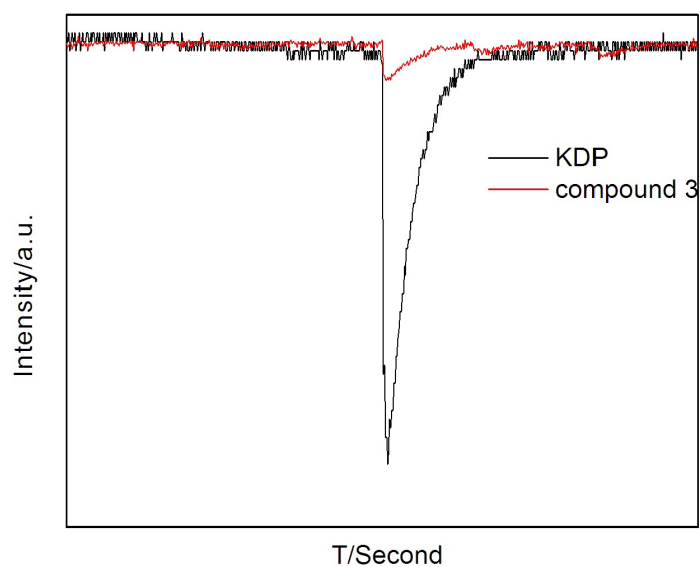

**Figure S6.** Comparison of the measured SHG response of **3** with that of KDP.

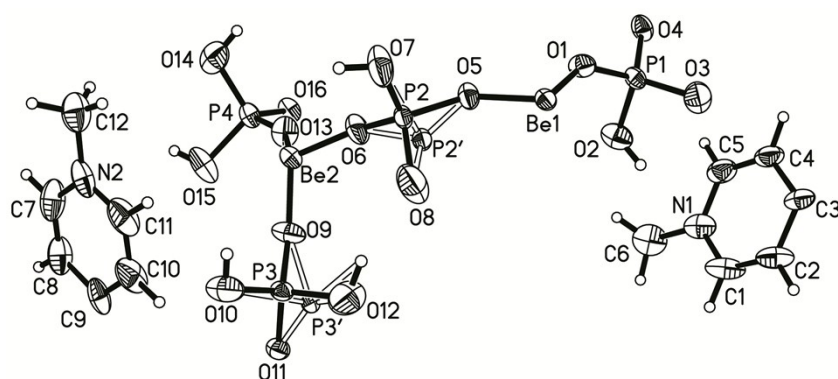

**Figure S7.** ORTEP plot of the asymmetric unit of compound **1**, showing the labeling scheme and the 30% probability displacement ellipsoid.

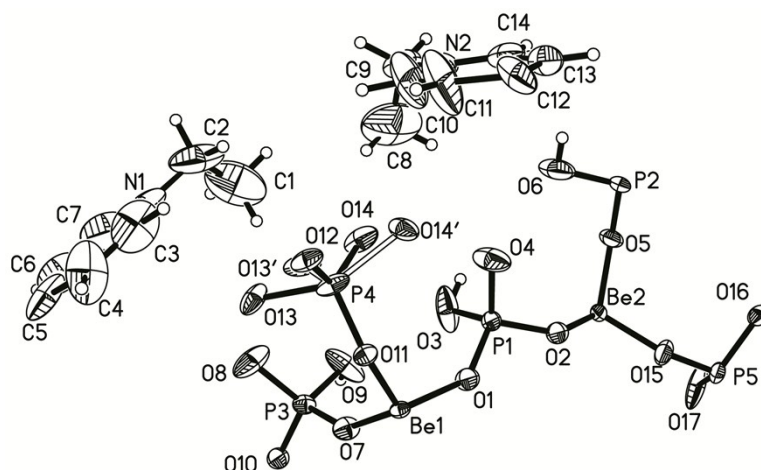

**Figure S8.** ORTEP plot of the asymmetric unit of compound **2**, showing the labeling scheme and the 30% probability displacement ellipsoid.

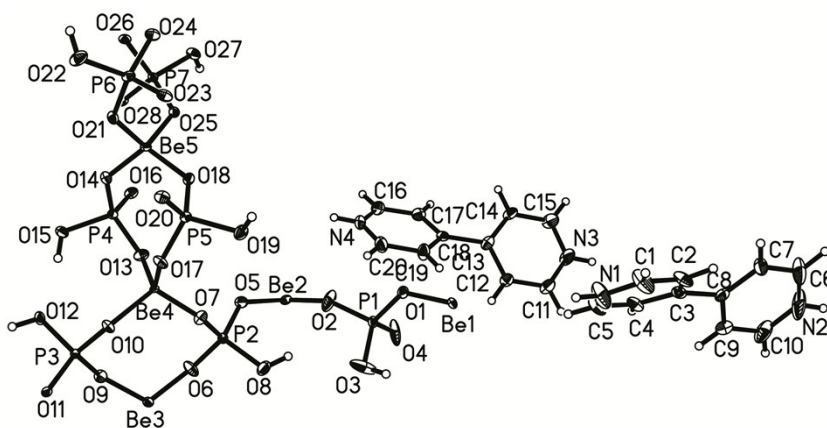

**Figure S9.** ORTEP plot of the asymmetric unit of compound **3**, showing the labeling scheme and the 30% probability displacement ellipsoid.

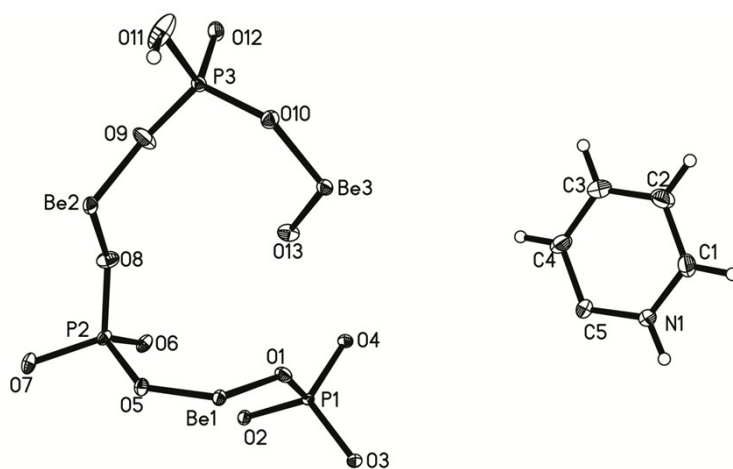

**Figure S10.** ORTEP plot of the asymmetric unit of compound **4**, showing the labeling scheme and the 30% probability displacement ellipsoid.

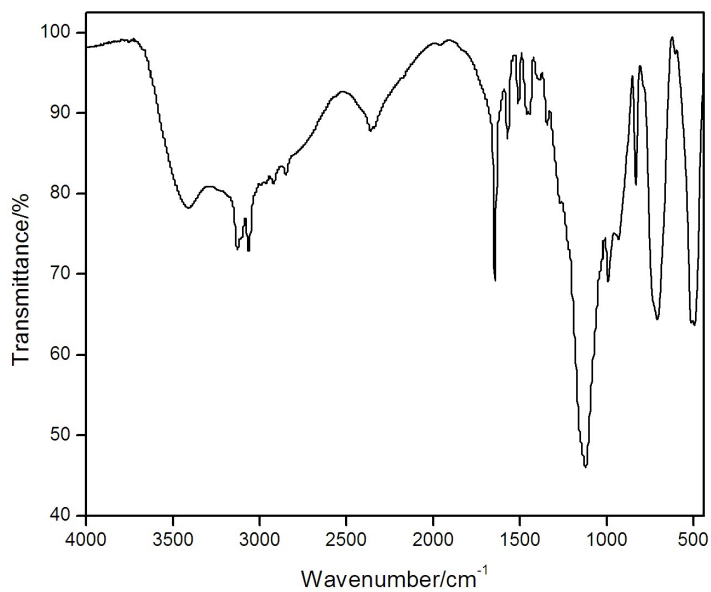

**Fig. S11.** IR spectrum of compound **1**.

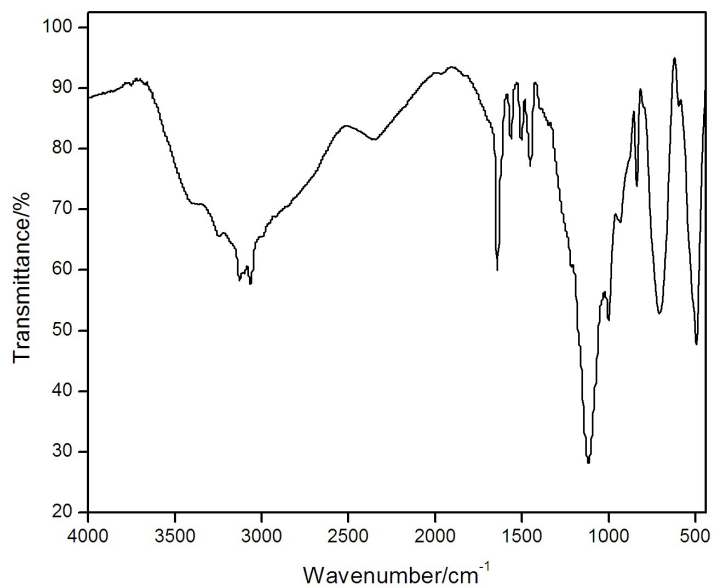

**Fig. S12.** IR spectrum of compound 2.

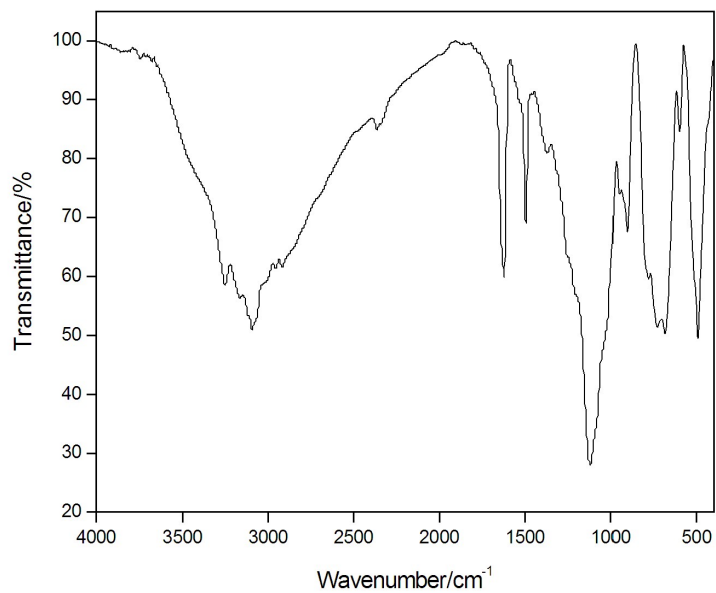

**Fig. S13.** IR spectrum of compound 3.

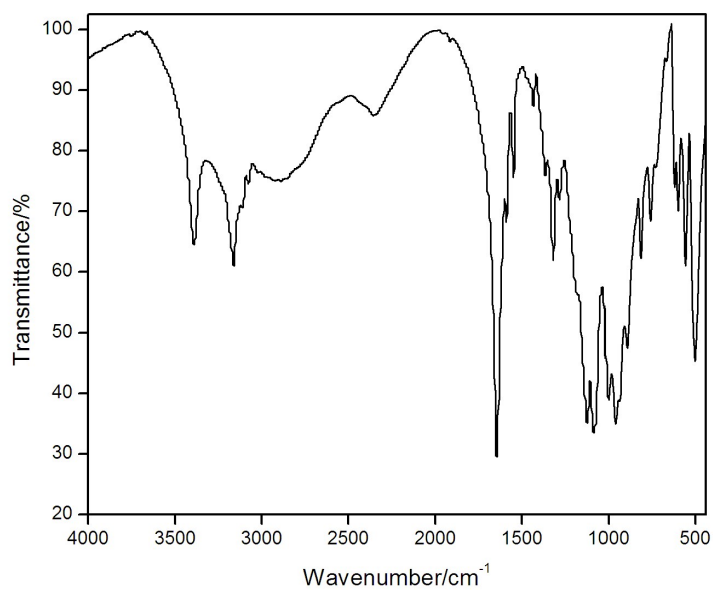

**Fig. S14.** IR spectrum of compound **4**.

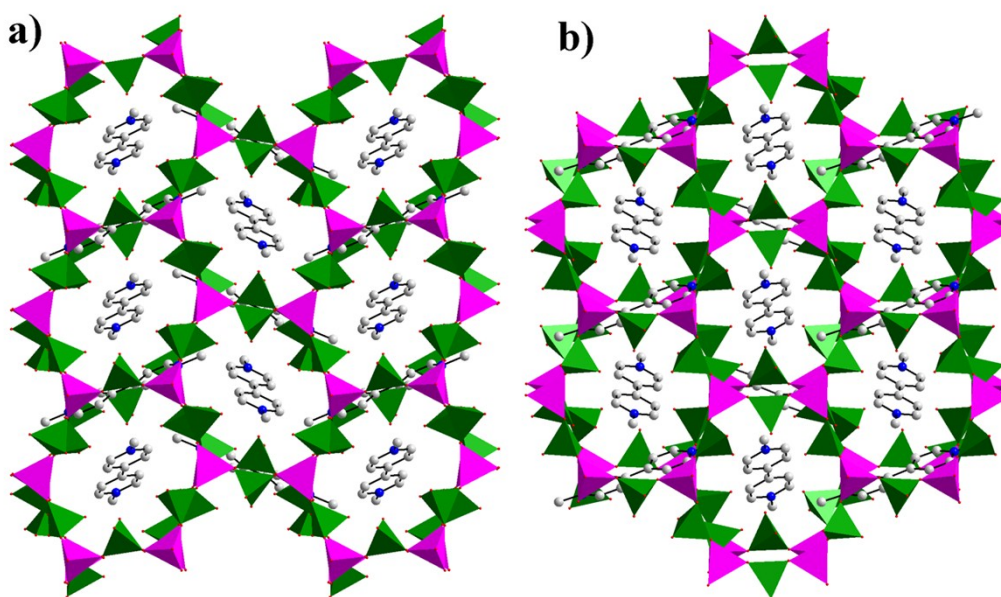

**Fig. S15.** A view of the structure of **1** along (a) the [100] and (b) [001] directions, showing the 12 MR channels accommodating MV cations.



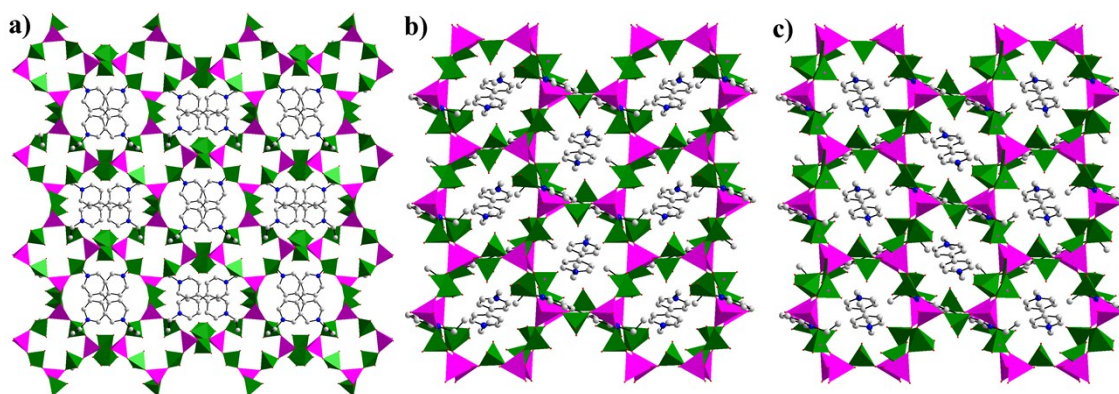

**Fig. S16.** A view of the structure of **2** along (a) the [100], (b) [110], and (c) [1-10] directions, showing the intersecting 16 MR, 12 MR, and 12 MR channels accommodating EV cations.
